# 1 **Heliconiini butterflies can learn time-dependent reward associations**

2 M. Wyatt Toure<sup>1,2\*</sup>, Fletcher J. Young<sup>2,3,4</sup>, W. Owen McMillan<sup>2</sup>, Stephen H. Montgomery<sup>2,4\*</sup>

3

4 <sup>1</sup>Department of Biology, McGill University, 1205 Docteur Penfield, Montreal, Canada, H3A  
5 1B1

6 <sup>2</sup>Smithsonian Tropical Research Institute, Gamboa, Panama

7 <sup>3</sup>Department of Zoology, University of Cambridge, Downing Street, Cambridge, UK, CB2 3EJ

8 <sup>4</sup>School of Biological Science, University of Bristol, 24 Tyndall Avenue, Bristol, UK, BS8 1TQ

9

## 10 **\* Corresponding authors:**

11 M. Wyatt Toure: [m\\_wyatt.toure@mail.mcgill.ca](mailto:m_wyatt.toure@mail.mcgill.ca)

12 Stephen H. Montgomery: [s.montgomery@bristol.ac.uk](mailto:s.montgomery@bristol.ac.uk)

13

## 14 **Abstract**

15 For many pollinators, flowers provide predictable temporal schedules of resource availability,  
16 meaning an ability to learn time-dependent information could be widely beneficial. However,  
17 this ability has only been demonstrated in a handful of species. Observational studies of  
18 *Heliconius* butterflies suggest that they may have an ability to form time-dependent foraging  
19 preferences. *Heliconius* are unique among butterflies in actively collecting and digesting pollen,  
20 a dietary behaviour linked to spatiotemporally faithful ‘trap-line’ foraging. Time-dependency of  
21 foraging preferences is hypothesised to allow *Heliconius* to exploit temporal predictability in  
22 alternative pollen resources, as well as contributing to optimal use of learnt foraging routes.  
23 Here, we provide the first experimental evidence in support of this hypothesis, demonstrating  
24 that *Heliconius hecale* can learn opposing colour preferences in two time periods. This shift in  
25 preference is robust to the order of presentation, suggesting that preference is tied to the time of  
26 day and not due to ordinal learning. However, we also show that this ability is not limited to  
27 *Heliconius*, as previously hypothesised, but is also present in a related genus of non-pollen  
28 feeding butterflies. This demonstrates that time learning pre-dates the origin of pollen-feeding  
29 and may be prevalent across butterflies with less specialized foraging behaviours.

30

31 **Keywords:** contextual learning, circadian memory, cognitive ecology, foraging, Lepidoptera,  
32 pollinator.

## 33 **1. Introduction**

34

35 The specific cues providing animals with reliable information about resource availability vary  
36 across environments, and this variation shapes which cues animals learn to use [1,2]. For  
37 example, animals inhabiting dark environments may preferentially learn associations with  
38 olfactory cues over visual cues [3,4]. These learning propensities can also evolve in response to  
39 changes in conditions. In experimental conditions where colour cues are reliable, but odours are  
40 not, *Drosophila* evolve strong visual learning propensities [5]. An animal's learning abilities are  
41 therefore influenced by the relative reliability of the cues associated with key resources [6].  
42 However, the context in which a cue is encountered can also have a role in shaping the reliability  
43 of that cue [7,8].

44 For many pollinators, foraging for flowers occurs in the context of temporal variation in  
45 resource profitability. Flowers tend to vary predictably in the availability of pollen and nectar  
46 [9]. Consequently, some specialist nectarivores use time as a contextual cue to modulate their  
47 foraging strategy [9]. For example, honey bees can consistently change their preference towards  
48 particular visual cues throughout the day [10,11], and some nectarivorous ants remember the  
49 time of day at which resources are most profitable [12,13]. However, the ability to learn time-  
50 dependent associations has only been formally demonstrated in a handful of invertebrates,  
51 including *Drosophila*, bees, and ants [11,14–21], and there is evidence that this ability can vary  
52 across species from the same family [12,13,22]. Hence, the prevalence of this ability, and the  
53 ecological factors that may account for its variability, are unclear.

54 *Heliconius* butterflies display a foraging behaviour not seen in the other 17,000+  
55 described species of butterflies [23–25]. *Heliconius* actively collect and feed on pollen grains  
56 from a restricted range of plants that occur in low densities, but flower continuously [23,26].  
57 This dietary adaptation provides an adult source of essential amino acids [24], which is plausibly  
58 linked to dramatically increased lifespan and reproductive longevity [27]. Pollen feeding is  
59 associated with a suite of derived foraging and cognitive adaptations not seen in other tropical  
60 butterflies, including fidelity to a local home-range [26,28], as well as temporally and spatially  
61 faithful 'trap-lining' behaviour, in which individual butterflies consistently visit particular

62 flowers at specific times of day [26]. Foraging efficiency is reported to increase with experience,  
63 suggesting trap-lines are learnt and refined throughout an individual's life [29]. Recent data also  
64 suggest wild *Heliconius* visit particular flower species in a manner that coincides with the  
65 maximal temporal availability of nectar and pollen rewards [30]. Since the timing of pollen  
66 release and nectar production varies across flowering plants [26,30], the time of day becomes a  
67 useful contextual cue to optimise foraging behaviour [26,30].

68 Given their derived foraging behaviour it has been hypothesised that *Heliconius* have  
69 evolved specific cognitive traits that support trap-lining behavior, including the ability to use the  
70 time of day as a contextual cue [26,31]. However, to our knowledge, time-dependent associative  
71 learning has not been reported in any Lepidoptera. In this study, we provide the first evidence  
72 that *Heliconius* butterflies can form time-dependent preferences for distinct flowers, and  
73 subsequently explore whether this ability is a derived trait in *Heliconius* associated with the  
74 evolution of pollen-feeding.

75

76

## 77 **2. Materials and Methods**

78

79 Experiments were performed at the Smithsonian Tropical Research Institute in Gamboa,  
80 Panama. We initially focused on *Heliconius hecale*, with secondary experiments in *Heliconius*  
81 *melpomene* and *Dryas iulia*, a closely related, non-pollen feeding Heliconiini. Individuals were  
82 labelled with unique IDs. Animal husbandry is described in the ESM.

83

### 84 *2.1. Experimental set-up*

85

86 Artificial feeders were constructed from foam sheets with an Eppendorf tube placed centrally.  
87 Yellow and purple were chosen as experimental colours as they were equally approached by  
88 naïve butterflies in our pilot experiments. During training, feeders contained either a 10% sugar  
89 water solution with 2.5 CCF per 50 ml of critical care formula (a surrogate for pollen; rewarded  
90 feeder), or a saturated quinine water solution (punished feeder). 12 artificial feeders of each  
91 colour were placed on a grid of 24, with randomised positions (Figure S1). Butterflies were

92 presented with feeders for 2 hours in the morning (AM) (08:00-10:00) and 2 hours in the  
93 afternoon (PM) (15:00-17:00).

94

## 95 *2.2. Experimental procedure*

96

97 The experiment had four phases. 1) During pre-training, freshly eclosed butterflies were fed on  
98 white artificial feeders, in the AM and PM, for two days. 2) The naïve shift in colour preference  
99 based on time of day was recorded prior to training, using clean, empty feeders. Due to low  
100 feeding rates in the PM session, we split the initial preference test across two days. AM colour  
101 preference was recorded on day 1, and butterflies were food deprived in the PM. PM colour  
102 preference was performed on day 2, after food deprivation in the AM. 3) The training reward  
103 structure was split such that the purple feeders were rewarded in AM and yellow feeders  
104 rewarded in PM, or vice versa. This training phase lasted for 10 days. 4) During the final post-  
105 training preference test butterflies were presented with clean, empty feeders for one hour in the  
106 AM, followed by the reinforced AM feeders for one hour, and then clean, empty feeders for an  
107 hour in the PM. To determine whether butterflies were learning the order in which they  
108 encountered the reward, rather than the time of day, a proportion of butterflies had the order of  
109 their AM and PM trials reversed (see supplemental material). During trials, artificial feeders  
110 were filmed from above with a GoPro HERO 5 camera (Figure S1). Using this footage, we  
111 scored the number of feeding attempts made by each individual.

112

## 113 *2.3. Training criterion*

114

115 For an observed behaviour to be a consequence of learning an animal must experience the  
116 reward contingency scheme [32]. Individuals were significantly less active in AM than PM  
117 during training ( $z = -13.11$ ,  $n = 41$ ,  $p < 0.01$ , figure S1A). As a consequence, some individuals ( $n$   
118 = 11) either did not attempt to feed from both feeders in AM or, more commonly, PM during  
119 training, or did not make any foraging attempts during a final test session, and were removed  
120 from further analyses. We analysed the remaining data in two ways. First, we ran models  
121 including all remaining individuals. Second, following previous learning studies [33–35], we  
122 established a training criterion. As we are interested in whether time-dependent memories are

123 formed and can therefore guide behaviour in the absence of the reward, we identified individuals  
124 that correctly adjust their behaviour in AM and PM sessions during training with reinforced  
125 feeders. We then asked whether these individuals demonstrate evidence of learning by behaving  
126 in the same way when presented with unreinforced feeders in the post-training preference test.  
127 Our training criteria was that the majority (>50%) of feeding choices made by an individual in  
128 the final two training days were correct in both AM and PM.

129

#### 130 *2.4. Statistical Analysis*

131

132 Data were analysed using generalized linear mixed models (GLMMs) in R [36]. We examined  
133 the influence of time on: (a) activity levels, measured as total foraging attempts, using GLMM  
134 with a Poisson distribution; (b) shifts in proportional colour preference when naïve, using  
135 GLMM with a binomial distribution; (c) shifts in proportional colour preference when trained,  
136 using GLMM with a binomial distribution, and presentation order in the final test included as a  
137 predictor. Across all models we included identity as a random effect. As individuals were trained  
138 and tested in groups of 8-13 within a single cage, where possible, a random effect of cage was  
139 also included to control for group level cage effects. We ensured all models fit their assumptions  
140 with the R package DHARMA [37] (see ESM).

141

### 142 **3. Results**

143

#### 144 *3.1. Heliconius butterflies can learn time-dependent associations*

145

146 Across the *H. hecale* that experienced the full training set, there was no significant effect of the  
147 time of day on naïve colour preferences ( $z = 0.90$ ,  $n = 30$ ,  $p = 0.36$ ), and no overall effect of time  
148 of day on trained colour preference ( $z = -1.846$ ,  $n = 30$ ,  $p = 0.06$ ). However, there was  
149 considerable variation in behavior during training, and only a subset of individuals ( $n = 16$ )  
150 passed the training criterion (Figure S2). Prior to training, both butterflies that met the training  
151 criterion, and those that did not, showed no significant shift in colour preference throughout the  
152 day ( $z = 0.33$ ,  $n = 16$ ,  $p = 0.73$  and  $z = 1.15$ ,  $n = 14$ ,  $p = 0.24$  respectively).

153           Once trained, however, individuals that passed the training criteria showed a significant  
154 effect of the time of day on colour preference ( $z = -2.24$ ,  $n = 16$ ,  $p = 0.02$ , figure 1B). On  
155 average, the preference for AM rewarded colour decreased by 11% from AM to PM. The  
156 presentation order of the post-training preference test (AM first vs PM first) had no effect ( $z =$   
157  $0.36$ ,  $p = 0.71$ ,  $n = 16$ ). Among individuals that did not meet the training criterion there was no  
158 shift in colour preference throughout the day after training ( $z = 1.05$ ,  $n = 14$ ,  $p = 0.29$ ). Addition  
159 of a small sample of *H. melpomene* ( $n = 6$ ) support and strengthen these results (see ESM).

160

### 161 3.2. Evidence time-learning is common across *Heliconiini*

162

163 In a secondary experiment using *Dryas iulia*, a closely related genus within *Heliconiini* that does  
164 not pollen feed, 12 individuals experienced the full training set, with no overall response to  
165 training ( $z = 0.01$ ,  $n = 12$ ,  $p = 0.99$ ). However, consistent with data from *H. hecale*, variation in  
166 the behaviour during training resulted in only a subset of individuals ( $n = 6$ ) passing the training  
167 criterion. Among these individuals there was no significant effect of time of day on naïve  
168 preference ( $z = 1.67$ ,  $n = 6$ ,  $p = 0.09$ ), but post-training there was a significant effect of time on  
169 colour preference, with preference for in the AM rewarded colour decreasing by 40% from AM  
170 to PM (Fig 2B,  $z = -9.334$ ,  $n = 6$ ,  $p < 0.001$ ). Individuals that did not reach the training criterion  
171 show no effect of time before training ( $z = 0.437$ ,  $n = 6$ ,  $p = 0.66$ ), and show a significant shift in  
172 the incorrect direction post-training ( $z = 7.354$ ,  $n = 6$ ,  $p < 0.001$ ).

173

## 174 4. Discussion

175

176 In this experiment, we demonstrate that *Heliconius* butterflies can use time as a context for  
177 making foraging decisions. The observed shift in preference here is similar in magnitude to  
178 observed temporal variation in floral visits by wild *Heliconius* [30]. Time-dependent learning  
179 and trap-lining can occur via an ordinal or a circadian timing mechanism [38]. Given  
180 presentation order has no effect on our results, we find no support for ordinal learning as an  
181 explanation, indicating the possible presence of a circadian memory. While suggestive of a  
182 circadian mechanism, our data do not confirm the presence of an endogenous mechanism, as it is  
183 possible butterflies are responding to external cues that covary with the time of day (*e.g.* light

184 levels, sun position). Nevertheless, the functional consequences of time learning by either  
185 mechanism are similar. To the best of our knowledge, these results provide the first experimental  
186 evidence of time-dependent learning in Lepidoptera.

187         The dietary innovation of pollen feeding in *Heliconius* butterflies has had major  
188 implications for their life history and ecology [28,39]. For most butterflies, reproductive output is  
189 constrained by the proteins collected during the larval stage [40]. Pollen feeding provides adult  
190 *Heliconius* with a reliable source of protein, leading to a pronounced delay of reproductive  
191 senescence [41]. Being able to efficiently exploit the sparsely distributed pollen-rich flowers is  
192 therefore critical to reproductive success in *Heliconius* [41]. Competition for pollen resources  
193 can be pronounced, and some *Heliconius* will forage early in the morning and actively defend  
194 flowers against other butterflies [23], suggesting selection may have favoured cognitive  
195 mechanisms that increase foraging efficiency. On this basis, it has been suggested that  
196 *Heliconius* may have acquired the ability to use time as a foraging cue in the context of pollen-  
197 feeding [26]. Indeed, our experiments confirm *Heliconius* can use time as a foraging cue.  
198 However, we also show that a non-pollen feeding relative, *Dryas iulia*, has the same capacity.  
199 This suggests that an ability to learn time-dependent associations did not evolve in response to  
200 selection for trapline foraging, and pre-dates the origin of pollen-feeding. Although our sample  
201 size for *Dryas* is smaller than for *Heliconius*, the proportion of individuals passing the training  
202 criterion and the pattern of results are highly consistent. While data on the foraging behavior of  
203 *Dryas* in the wild is limited, they have no known foraging specialisations that are not seen in  
204 other groups, and have lifespans typical for tropical species [42]. It is therefore reasonable to  
205 suggest that the ability to use time as a contextual foraging cue may be widespread across  
206 butterflies.

207         Previous work shows that time learning is prevalent among social Hymenoptera, where  
208 allocentric foraging provides an ecological context for using time cues in the context of a  
209 consistent foraging landscape [43–45]. *Heliconius* have converged on several foraging  
210 behaviours observed in these species, and also share dramatically expanded mushroom bodies, a  
211 region of the insect brain responsible for learning and memory [39]. Time-dependent memory  
212 acquisition is also reported in cockroaches [46], a third clade associated with mushroom body  
213 expansion [47]. This could be seen as indicating that the ecological challenges associated with  
214 learning foraging sites exert selective pressures favouring neuroanatomical elaboration

215 supporting specialised cognitive abilities, like time learning [21,47–50]. However, our data on  
216 *Dryas* suggest that elaborated mushroom bodies are not necessary for the time learning abilities  
217 displayed in these taxa. This is further supported by the fact that *Drosophila*, which have  
218 substantially smaller mushroom bodies, can also learn time-dependent olfactory associations  
219 [14]. Therefore, the neural basis of integrating time information with foraging cues may be  
220 relatively simple. Integrating time and place memories may be more complex than forming these  
221 associations in isolation, as hypothesised in hummingbirds [48,51]. However, time learning is  
222 likely to be an important precursor for temporally and spatially faithful foraging. Hence, the pre-  
223 existence of this trait may have helped facilitate the evolution of trap-lining, and the transition to  
224 pollen-feeding in *Heliconius*.

225         The ability to form time-dependent associations may have wider ecological effects. If a  
226 pollinator has a time learning ability, sympatric plant species can coexist by sharing, rather than  
227 competing for, the same pollinator by temporally partitioning pollen or nectar rewards [28]. This  
228 effect may explain observed divergence in the nectar/pollen release schedules of *Psiguria*  
229 flowers, a preferred pollen resource for *Heliconius* [26]. A similar phenomenon is observed in  
230 bees and *Dalechampia* flowers, adding support to the idea that time learning abilities have  
231 implications for ecological diversity [28].

232         Overall, our results support the importance of temporal predictability in resources, rather  
233 than allocentric foraging or pollen-feeding, in promoting an ability for time learning. This is  
234 supported by the presence of time learning in both *Dryas* and *Heliconius*, and both pollinivorous  
235 and nectarivorous Hymenoptera. Moreover, time learning does not seem to be associated with an  
236 expansion of insect memory centres. Whether butterflies use internal or external cues to register  
237 time of day remains an open question for future study.

238

## 239 **Ethics**

240 This work was carried out under permission from the Ministerio del Ambiente, Panama (permit  
241 number: SE/AP-14-18).

242

## 243 **Data accessibility**

244 Data and R scripts are available from the Dryad Digital Repository:  
245 (<https://doi.org/10.5061/dryad.c59zw3r4m>).



246

## 247 **Author's contributions**

248 MWT, FJY, SHM conceived and designed the experiment. MWT collected and analysed the  
249 data, and wrote the paper, with practical support and input from FJY and WOM, under the  
250 supervision of SHM.

251

252

## 253 **Competing interests**

254 We declare no conflict of interest.

255

## 256 **Funding**

257 This research was supported by an NSERC-CREATE in Biodiversity, Ecosystem Services and  
258 Sustainability Fellowship (grant#240822) to MWT, the Smithsonian Tropical Research Institute,  
259 a Trinity College (Cambridge) International Studentship to FJY, and a NERC IRF  
260 (NE/N014936/1) and ERC Starter Grant (758508) to SHM.

261

## 262 **Acknowledgements**

263 We thank Lina Gabriela, Laura Hebberecht-Lopez, Oscar Paneso and Cruz Batista Saez for  
264 support at the insectaries. We also thank the Reader and Guigueno labs (McGill), EBaB lab  
265 (Bristol), and the Butterfly Ecology and Evolution Research group (Smithsonian) for comments  
266 on the manuscript. We thank Sebastian Mena for the images of butterflies for the figures. Finally,  
267 we are grateful to the Ministerio del Ambiente, Panama for collection permits and facilitating  
268 this work.

269

## 270 **References**

271

- 272 1. Smid HM, Vet LEM. 2016 The complexity of learning, memory and neural processes in  
273 an evolutionary ecological context. *Curr. Opin. Insect Sci.* **15**, 61–69.  
274 (doi:10.1016/j.cois.2016.03.008)
- 275 2. McPherson LJ, Mills NJ. 2007 Einfluß visueller und olfaktorischer Auslöser auf das

- 276 Futtersuche-Verhalten der Wegwespen-Art *Mischocyttarus flavitarsis* Hymenoptera.  
277 *Entomol. Gen.* **30**, 105–118. (doi:10.1127/entom.gen/30/2007/105)
- 278 3. Nigrosh BJ, Slotnick BM, Nevin JA. 1975 Olfactory discrimination, reversal learning, and  
279 stimulus control in rats. *J. Comp. Physiol. Psychol.* **89**, 285–294. (doi:10.1037/h0076821)
- 280 4. Slotnick BM, Katz HM. 1974 Olfactory Learning-Set Formation in Rats. *Science* **185**,  
281 796–798. (doi:10.1126/science.185.4153.796)
- 282 5. Dunlap AS, Stephens DW. 2014 Experimental evolution of prepared learning. *Proc. Natl.*  
283 *Acad. Sci.* **111**, 11750–11755. (doi:10.1073/pnas.1404176111)
- 284 6. Smid HM, Wang G, Bukovinszky T, Steidle JLM, Bleeker MAK, van Loon JJ., Vet LEM.  
285 2007 Species-specific acquisition and consolidation of long-term memory in parasitic  
286 wasps. *Proc. R. Soc. B Biol. Sci.* **274**, 1539–1546. (doi:10.1098/rspb.2007.0305)
- 287 7. Yoshida M, Itoh Y, Ômura H, Arikawa K, Kinoshita M. 2015 Plant scents modify innate  
288 colour preference in foraging swallowtail butterflies. *Biol. Lett.* **11**, 20150390.  
289 (doi:10.1098/rsbl.2015.0390)
- 290 8. Blackawton PS *et al.* 2011 Blackawton bees. *Biol. Lett.* **7**, 168–172.  
291 (doi:10.1098/rsbl.2010.1056)
- 292 9. Edge AA, Van Nest BN, Johnson JN, Miller SN, Naeger N, Boyd SD, Moore D. 2012  
293 Diel nectar secretion rhythm in squash (*Cucurbita pepo*) and its relation with pollinator  
294 activity. *Apidologie* **43**, 1–16. (doi:10.1007/s13592-011-0087-8)
- 295 10. Gould JL. 1987 Honey bees store learned flower-landing behaviour according to time of  
296 day. *Anim. Behav.* **35**, 1579–1581. (doi:10.1016/S0003-3472(87)80038-6)
- 297 11. Zhang S, Schwarz S, Pahl M, Zhu H, Tautz J. 2006 Honeybee memory: a honeybee knows  
298 what to do and when. *J. Exp. Biol.* **209**, 4420–4428. (doi:10.1242/jeb.02522)
- 299 12. Schatz B, Lachaud JP, Beugnon G. 1999 Spatio-temporal learning by the ant *Ectatomma*  
300 *ruidum*. *J. Exp. Biol.* **202**, 1897–1907.
- 301 13. Fourcassié V, Traniello JFA. 1994 Food searching behaviour in the ant *Formica*  
302 *schaufussi* (Hymenoptera, Formicidae): Response of naive foragers to protein and  
303 carbohydrate food. *Anim. Behav.* **48**, 69–79. (doi:10.1006/anbe.1994.1212)
- 304 14. Chouhan NS, Wolf R, Helfrich-Förster C, Heisenberg M. 2015 Flies Remember the Time  
305 of Day. *Curr. Biol.* **25**, 1619–1624. (doi:10.1016/j.cub.2015.04.032)
- 306 15. Murphy CM, Breed MD. 2008 Time-Place Learning in a Neotropical Stingless Bee,

- 307 Trigona fulviventris Guérin (Hymenoptera: Apidae). *J. Kansas Entomol. Soc.* **81**, 73–76.  
308 (doi:10.2317/jkes-704.23.1)
- 309 16. De Araujo FF, Oliveira R, Mota T, Stehmann JR, Schindwein C. 2020 Solitary bee  
310 pollinators adjust pollen foraging to the unpredictable flower opening of a species of  
311 Petunia (Solanaceae). *Biol. J. Linn. Soc.* **129**, 273–287. (doi:10.1093/biolinnean/blz193)
- 312 17. Naeger NL, Van Nest BN, Johnson JN, Boyd SD, Southey BR, Rodriguez-Zas SL, Moore  
313 D, Robinson GE. 2011 Neurogenomic signatures of spatiotemporal memories in time-  
314 trained forager honey bees. *J. Exp. Biol.* **214**, 979–987. (doi:10.1242/jeb.053421)
- 315 18. Wagner AE, Van Nest BN, Hobbs CN, Moore D. 2013 Persistence, reticence and the  
316 management of multiple time memories by forager honey bees. *J. Exp. Biol.* **216**, 1131–  
317 1141. (doi:10.1242/jeb.064881)
- 318 19. De Jesus TNCS, Venturieri GC, Contrera FAL. 2014 Time-place learning in the bee  
319 Melipona fasciculata (Apidae, Meliponini). *Apidologie* **45**, 257–265.  
320 (doi:10.1007/s13592-013-0245-2)
- 321 20. Mulder C, Gerkema MP, Van der Zee EA. 2013 Circadian clocks and memory: Time-  
322 place learning. *Front. Mol. Neurosci.* **6**, 1–10. (doi:10.3389/fnmol.2013.00008)
- 323 21. Tello-Ramos MC, Hurlly TA, Higgott C, Healy SD. 2015 Time-place learning in wild,  
324 free-living hummingbirds. *Anim. Behav.* **104**, 123–129.  
325 (doi:10.1016/j.anbehav.2015.03.015)
- 326 22. Falk H, Biebach H, Krebs JR. 1992 Learning a time-place pattern of food availability: a  
327 comparison between an insectivorous and a granivorous weaver species (*Ploceus bicolor*  
328 and *Euplectes hordeaceus*). *Behav. Ecol. Sociobiol.* **31**, 9–15. (doi:10.1007/BF00167811)
- 329 23. Murawski DA. 1987 Floral Resource Variation, Pollinator Response, and Potential Pollen  
330 Flow in *Psiguria Warscewiczii*. *Ecology* **68**, 1273–1282. (doi:10.2307/1939212)
- 331 24. Gilbert LE. 1972 Pollen Feeding and Reproductive Biology of Heliconius Butterflies.  
332 *Proc. Natl. Acad. Sci.* **69**, 1403–1407. (doi:10.1073/pnas.69.6.1403)
- 333 25. Shields O. 1989 World numbers of butterflies. *J. Lepid. Soc.* **43**, 178–183.
- 334 26. Gilbert LE. 1975 Ecological consequences of a coevolved mutualism between butterflies  
335 and plants. *Coevol. Anim. plants.* , 210–240.
- 336 27. Cook LM, Thomason EW, Young AM. 1976 Population Structure, Dynamics and  
337 Dispersal of the Tropical Butterfly *Heliconius charitonius*. *J. Anim. Ecol.* **45**, 851.

- 338 (doi:10.2307/3584)
- 339 28. Bloch G, Bar-Shai N, Cytter Y, Green R. 2017 Time is honey: Circadian clocks of bees  
340 and flowers and how their interactions may influence ecological communities. *Philos.*  
341 *Trans. R. Soc. B Biol. Sci.* **372**. (doi:10.1098/rstb.2016.0256)
- 342 29. Boggs CL, Smiley JT, Gilbert L El. 1981 Patterns of pollen exploitation by Heliconius  
343 butterflies. *Oecologia* **48**, 284–289. (doi:10.1007/BF00347978)
- 344 30. Barp EA, Soares GLG, Giani EJM, Rodrigues D, Moreira GRP. 2011 Variation in Nectar  
345 and Pollen Availability, Sucrose Preference, and Daily Response in the Use of Flowers by  
346 Heliconius erato phyllis. *J. Insect Behav.* **24**, 200–219. (doi:10.1007/s10905-010-9248-2)
- 347 31. Sivinski J. 1989 Mushroom body development in nymphalid butterflies: A correlate of  
348 learning? *J. Insect Behav.* **2**, 277–283. (doi:10.1007/BF01053299)
- 349 32. Healy SD, Rowe C. 2013 Costs and benefits of evolving a larger brain: Doubts over the  
350 evidence that large brains lead to better cognition. *Anim. Behav.* **86**, e1.  
351 (doi:10.1016/j.anbehav.2013.05.017)
- 352 33. Huebner F, Fichtel C, Kappeler PM. 2018 Linking cognition with fitness in a wild  
353 primate: fitness correlates of problem-solving performance and spatial learning ability.  
354 *Philos. Trans. R. Soc. B Biol. Sci.* **373**, 20170295. (doi:10.1098/rstb.2017.0295)
- 355 34. Damas-Moreira I, Oliveira D, Santos JL, Riley JL, Harris DJ, Whiting MJ. 2018 Learning  
356 from others: an invasive lizard uses social information from both conspecifics and  
357 heterospecifics. *Biol. Lett.* **14**, 20180532. (doi:10.1098/rsbl.2018.0532)
- 358 35. Batabyal A, Thaker M. 2019 Lizards from suburban areas learn faster to stay safe. *Biol.*  
359 *Lett.* **15**, 20190009. (doi:10.1098/rsbl.2019.0009)
- 360 36. R Core Team. 2019 R: A language and environment for statistical computing.
- 361 37. Hartig F. 2018 DHARMA: residual diagnostics for hierarchical (multi-level/mixed)  
362 regression models. R package v. 0.2. 0.
- 363 38. Pritchard DJ, Ramos MCT, Muth F, Healy SD. 2017 Treating hummingbirds as feathered  
364 bees: a case of ethological cross-pollination. *Biol. Lett.* **13**. (doi:10.1098/rsbl.2017.0610)
- 365 39. Montgomery SH, Merrill RM, Ott SR. 2016 Brain composition in Heliconius butterflies,  
366 posteclosion growth and experience-dependent neuropil plasticity. *J. Comp. Neurol.* **524**,  
367 1747–1769. (doi:10.1002/cne.23993)
- 368 40. Slansky Jr F, Scriber JM. 1985 Food consumption and utilization. *Comparative Insect*

- 369 Physiology Biochemistry and Pharmacology. , 87–163.
- 370 41. Dunlap-Pianka H, Boggs CL, Gilbert LE. 1977 Ovarian dynamics in heliconiine  
371 butterflies: Programmed senescence versus eternal youth. *Science* **197**, 487–490.  
372 (doi:10.1126/science.197.4302.487)
- 373 42. Maharaj G. 2018 Color-mediated foraging by pollinators: A comparative study of two  
374 passionflower butterflies at Lantana camara. See <https://irl.umsl.edu/dissertation/42/>.
- 375 43. Durier V, Rivault C. 2001 Effects of spatial knowledge and feeding experience on  
376 foraging choices in German cockroaches. *Anim. Behav.* **62**, 681–688.  
377 (doi:10.1006/anbe.2001.1807)
- 378 44. Jiggins CD. 2017 *The ecology and evolution of Heliconius butterflies*. Oxford University  
379 Press.
- 380 45. Degen J *et al.* 2016 Honeybees Learn Landscape Features during Exploratory Orientation  
381 Flights. *Curr. Biol.* **26**, 2800–2804. (doi:10.1016/j.cub.2016.08.013)
- 382 46. Decker S, McConnaughey S, Page TL. 2007 Circadian regulation of insect olfactory  
383 learning. *Proc. Natl. Acad. Sci. U. S. A.* **104**, 15905–15910.  
384 (doi:10.1073/pnas.0702082104)
- 385 47. Farris SM, Van Dyke JW. 2015 Evolution and function of the insect mushroom bodies:  
386 contributions from comparative and model systems studies. *Curr. Opin. Insect Sci.* **12**,  
387 19–25. (doi:10.1016/j.cois.2015.08.006)
- 388 48. Ward BJ, Day LB, Wilkening SR, Wylie DR, Saucier DM, Iwaniuk AN. 2012  
389 Hummingbirds have a greatly enlarged hippocampal formation. *Biol. Lett.* **8**, 657–659.  
390 (doi:10.1098/rsbl.2011.1180)
- 391 49. Farris SM. 2013 Evolution of Complex Higher Brain Centers and Behaviors: Behavioral  
392 Correlates of Mushroom Body Elaboration in Insects. *Brain. Behav. Evol.* **82**, 9–18.  
393 (doi:10.1159/000352057)
- 394 50. Farris SM, Schulmeister S. 2011 Parasitoidism, not sociality, is associated with the  
395 evolution of elaborate mushroom bodies in the brains of hymenopteran insects. *Proc. R.  
396 Soc. B Biol. Sci.* **278**, 940–951. (doi:10.1098/rspb.2010.2161)
- 397 51. Marshall RES, Hurly TA, Sturgeon J, Shuker DM, Healy SD. 2013 What , where and  
398 when □: deconstructing memory. *Proc. R. Soc. B Biol. Sci.* **280**, 20132194.  
399 (doi:10.1098/rspb.2013.2194)

400

401

402

403

404

405

406

## 407 **Figure legends**

408

409 Figure 1: Data from the colour preference trials of *H. hecale* individuals who met the training  
410 criterion. Artificial feeders were new, empty, and unreinforced in both cases. (A) Naïve  
411 preferences of butterflies in the morning and afternoon. (B) Colour preferences of butterflies  
412 from (A) after training. Grey lines connect individuals across time periods. Data are presented as  
413 means  $\pm$  SE. \* indicates  $P < 0.05$

414

415 Figure 2: Data from the colour preference trials of *D. iulia* individuals who met the training  
416 criterion. Artificial feeders were new, empty, and unreinforced in both cases. (A) Naïve  
417 preferences of butterflies in the morning and afternoon. (B) Colour preferences of the butterflies  
418 from (A) after training. Grey lines connect individuals across time periods. Data are presented as  
419 means  $\pm$  SE. \*\* indicates  $P < 0.01$

**(A)** Naive shift in preference

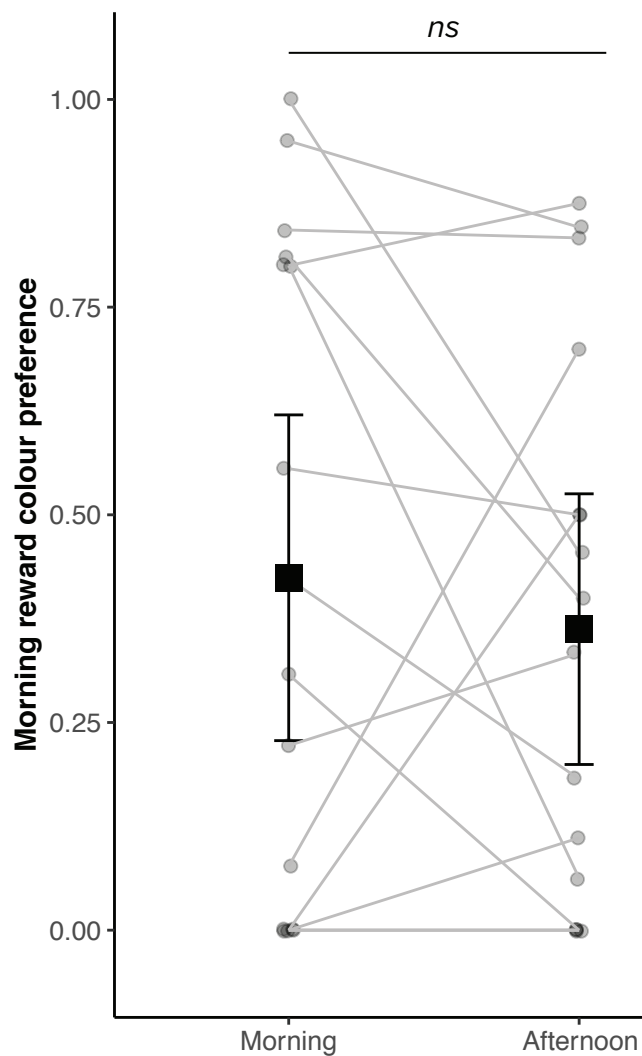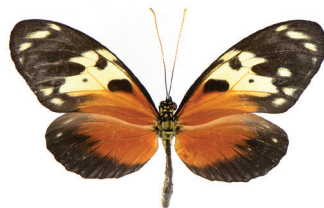

**(B)** Trained shift in preference

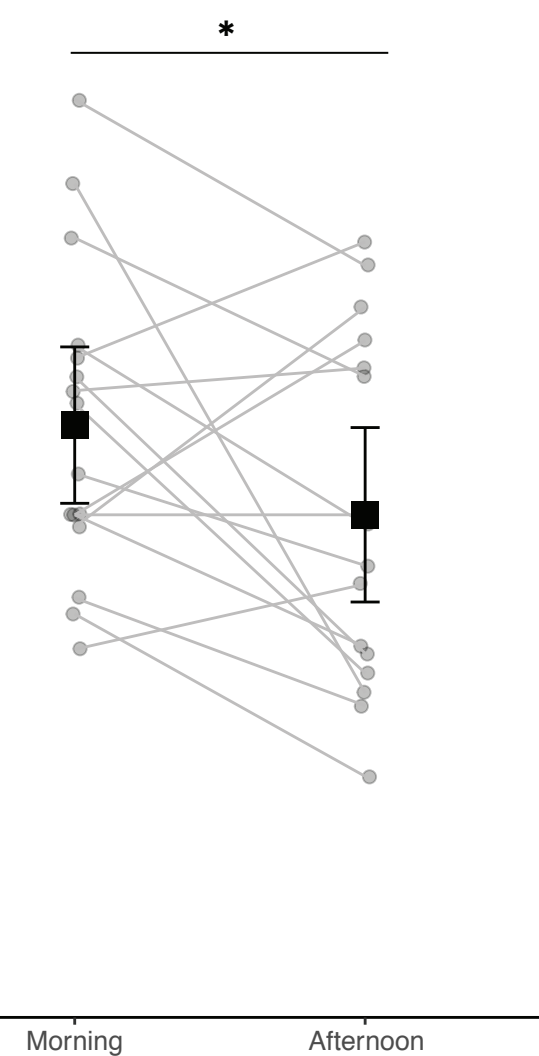

**(A)** Naive shift in preference

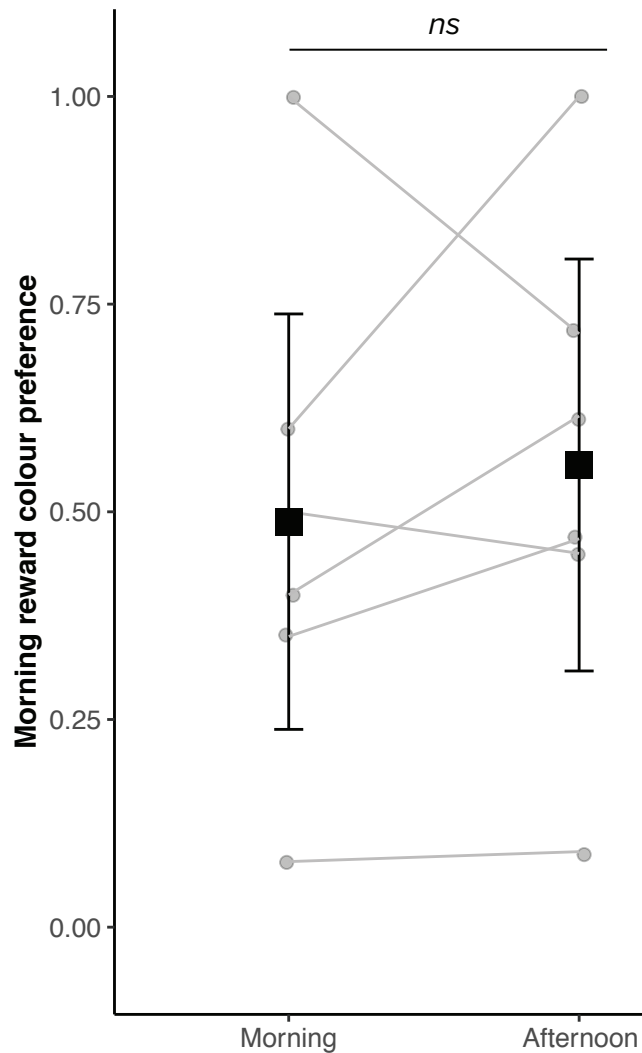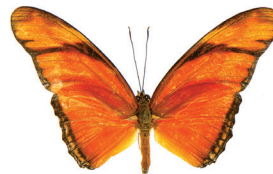

**(B)** Trained shift in preference

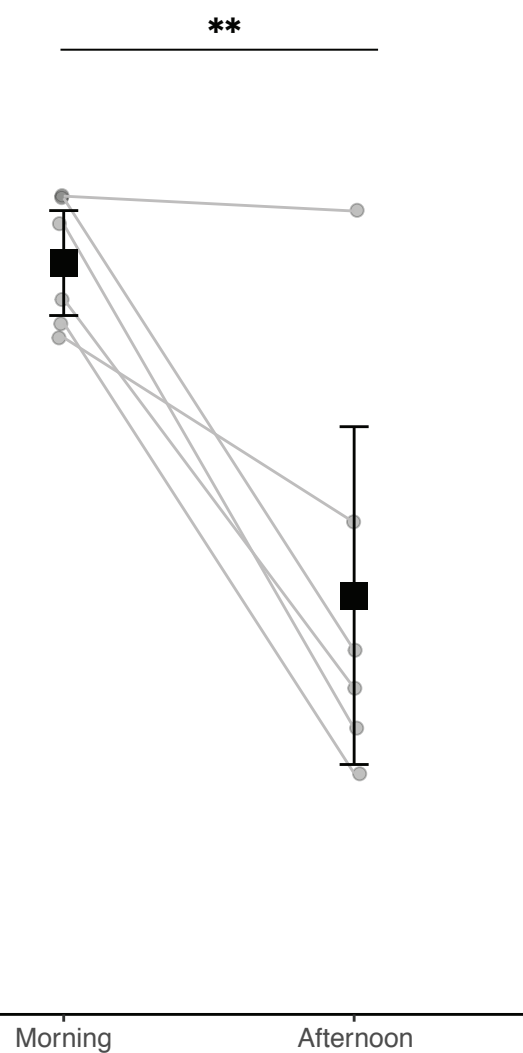

Source: https://biorxiv.org/content/10.1101/2020.06.06.135459v1.full.pdf
